# Supplementary material for: Case report: a giant arachnoid cyst masking Alzheimer’s disease
Source: Springer Nature journal article supplement (doi:10.1186/s12888-019-2247-8), 2019-09-05

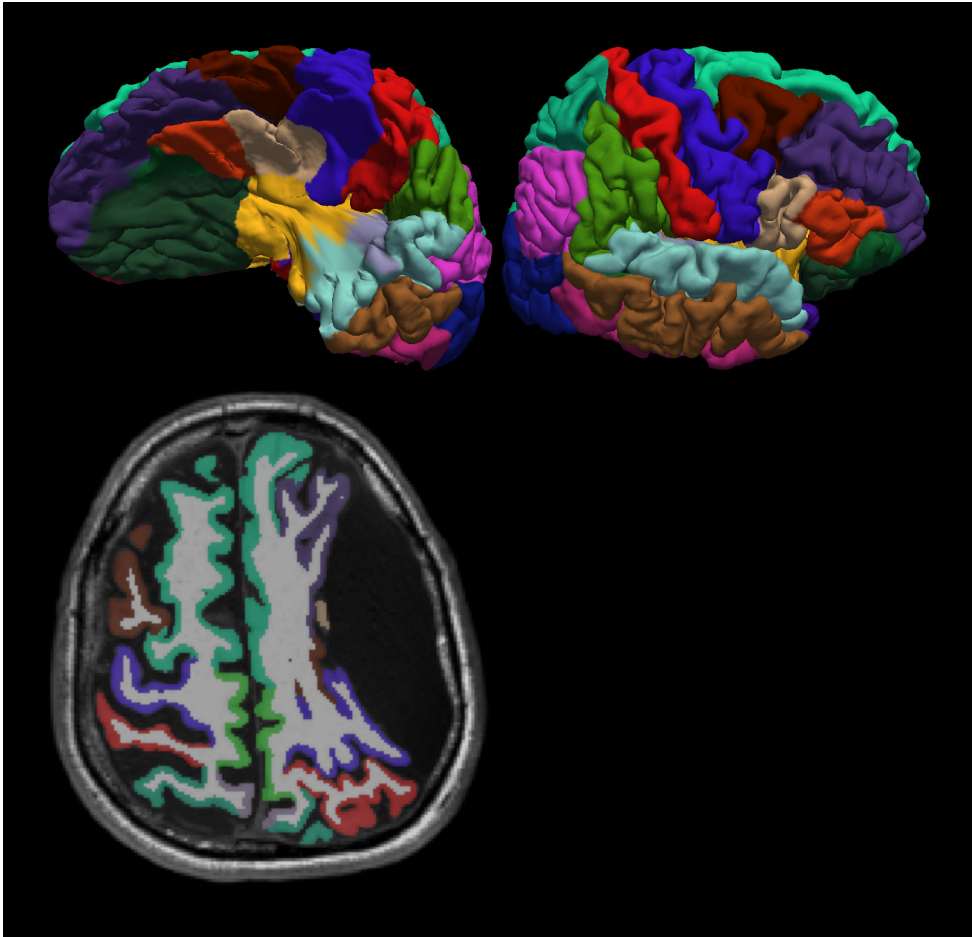

Supplement: MOESM3 [file 17142816]
